# Supplementary material
Source: Research Square preprint supplement (doi:10.21203/rs.3.rs-9226304/v1)
Supplement: Supplementary file 1 [file eef294bbe4671e287fdddd20.docx]

Supplementary table

**Table S1** Details of sequences uploaded to NCBI in this study

| **AIWC ID** | **Date of Stranding** | **Location** | **Accession No.** | | | |
| --- | --- | --- | --- | --- | --- | --- |
| COX | CYTB | 12S rRNA | 16S rRNA |
| AIWC/RES/10/24/0**447** | 11.11.2024 | Cuddalore,  (11.508126**° N** 79.774186**° E)**. | PZ092955 | PZ098171 | PZ096698 | PZ092851 |
| AIWC/RES/11/24/0**457** | 15.11.2024 | Marina  (13.03227778**° N** 80.28019444**° E)** | PZ092953 | PZ098170 | PZ096697 | PZ092821 |

**Table S2** Details of annealing temperature and primers used in this study

| **Gene** | **Annealing Temperature (°C)** | **Primer Sequences** | **Reference** |
| --- | --- | --- | --- |
| COX | 50 | Forward Primer(F): 5’-ATAATTGGNGGNTTTGGNAAYTG- 3’  Reverse Primer(R): 5’ -GTRAAYATRTGGTGGGCTCATAC- 3’ | Under publication |
| CYTB | 51 | mcb398 5’-TACCATGAGGACAAATATCATTCTG- 3’  mcb869 5’-CCTCCTAGTTTGTTAGGGATTGATCG -3’ | Verma & Singh (2003) |
| 12S rRNA | 61 | L1091 5'-AAAAAGCTTCAAACTGGGATTAGATACCCCACTAT-3'  H1478 5'-TGACTGCAGAGGGTGACGGGCGGTGTGT-3' | Kocher et al. (1989) |
| 16S rRNA | 60.8 | Fwd 5'-CGCCTGTTTATCAAAAACAT-3'  Rev 5'- CTCCGGTTTGAACTCAGATC-3 | Guha & Kashyap (2005). |
